# Supplementary material
Source: PubMed Central journal article supplement (PMC6900800)
Supplement: ASN.2019030321SupplementaryData.pdf [file ASN.2019030321SupplementaryData.pdf]

## Supplemental Material Table of Contents

1. Supplemental Table 1. RNA sequencing identification of proximal tubule marker expression in HPTC
2. Supplemental Table 2. qPCR primers list
3. Supplemental Figure 1: EGFR ligand dose response in HPTC.
4. Supplemental Figure 2. sAREG and sHB-EGF differentially regulate EGFR cell-surface levels in HPTCs.

**Supplemental Table 1. RNA sequencing identification of proximal tubule marker expression in HPTC**

| Ensembl gene ID | Gene name | CPM        | Expression Ranking |
|-----------------|-----------|------------|--------------------|
| ENSG00000245532 | NEAT1     | 426.052957 | 298                |
| ENSG00000054654 | SYNE2     | 140.832669 | 1355               |
| ENSG00000099250 | NRP1      | 112.058187 | 1796               |
| ENSG00000090565 | RAB11FIP3 | 66.0499293 | >2000              |
| ENSG00000022556 | NLRP2     | 43.4322078 | >2000              |
| ENSG00000111961 | SASH1     | 34.4933133 | >2000              |
| ENSG00000048471 | SNX29     | 17.774747  | >2000              |
| ENSG00000069020 | MAST4     | 14.1940371 | >2000              |
| ENSG00000066230 | SLC9A3    | 13.3954615 | >2000              |
| ENSG00000173068 | BNC2      | 12.5711254 | >2000              |
| ENSG00000169760 | NLGN1     | 2.29268475 | >2000              |
| ENSG00000262619 | LINC00621 | 0.9016176  | >2000              |
| ENSG00000158296 | SLC13A3   | 0.85009659 | >2000              |
| ENSG00000100031 | GGT1      | 0.85009659 | >2000              |
| ENSG00000153707 | PTPRD     | 0.20608402 | >2000              |
| ENSG00000107611 | CUBN      | 0.20608402 | >2000              |
| ENSG00000166415 | WDR72     | 0.05152101 | >2000              |
| ENSG00000228262 | LINC01320 | 0.0257605  | >2000              |

CPM: Counts per million

Supplemental Table 2. qPCR primers list

| Target gene | Synonym      | Species     | Direction | Sequence              |
|-------------|--------------|-------------|-----------|-----------------------|
| ADAM17      | TACE         | human       | Forward   | AGTGCAGTGACAGGAACAGT  |
| ADAM17      | TACE         | human       | Reverse   | GGACACGCCTTTGCAAGTAG  |
| AREG        |              | human       | Forward   | TCGGCTCAGGCCATTATGC   |
| AREG        |              | human       | Reverse   | AATCCATCAGCACTGTGGTCC |
| EGF         |              | human       | Forward   | CTTGGGAGCCTGAGCAGAAA  |
| EGF         |              | human       | Reverse   | TGCACAAGTGTGACTGGAGC  |
| EGFR        |              | human       | Forward   | CGAATGGGCCTAAGATCCCG  |
| EGFR        |              | human       | Reverse   | CTTCGCATGAAGAGGCCGAT  |
| EPGN        |              | human       | Forward   | ACAGAAGCTGACAACATAGA  |
| EPGN        |              | human       | Reverse   | AGCTCATGGTGGGAATGCACA |
| EREG        |              | human       | Forward   | ACGTGTGGCTCAAGTGTCAA  |
| EREG        |              | human       | Reverse   | CACTTCACACCTGCAGTAGTT |
| GAPDH       |              | human/mouse | Forward   | ACCACAGTCCATGCCATCAC  |
| GAPDH       |              | human/mouse | Reverse   | TCCACCACCCTGTTGCTGTA  |
| HBEGF       |              | human       | Forward   | TTGTGCTCAAGGAATCGGCT  |
| HBEGF       |              | human       | Reverse   | CAACTGGGGACGAAGGAGT   |
| PRLP0       |              | human       | Forward   | CGTCTCGTGGAAGTGACAT   |
| PRLP0       |              | human       | Reverse   | TAGTTGGACTTCCAGGTCGC  |
| TGFA        |              | human       | Forward   | GTA AAATGGTCCCCTCGGCT |
| TGFA        |              | human       | Reverse   | GGGTCTGCACTCAGCGG     |
| YAP1        | YAP          | human       | Forward   | TGATGGATGGGAACAAGCCA  |
| YAP1        | YAP          | human       | Reverse   | TGGTTCATGGCAAACGAGG   |
|             |              |             |           |                       |
| Acta2       | $\alpha$ SMA | mouse       | Forward   | AGCCATCTTTCATTGGGATGC |
| Acta2       | $\alpha$ SMA | mouse       | Reverse   | TACCCCTGACAGGACGTTG   |
| Adam17      | Tace         | mouse       | Forward   | TCTGAAGAGTTTGTTCGTGCA |
| Adam17      | Tace         | mouse       | Reverse   | CTTCTCCACGGCCCATGTAT  |
| Areg        |              | mouse       | Forward   | GCTGAGGACAATGCAGGGT   |
| Areg        |              | mouse       | Reverse   | GTGACAACTGGGCATCTGGA  |
| Ccl2        | Mcp1         | mouse       | Forward   | CACTCACCTGCTGCTACTCA  |
| Ccl2        | Mcp1         | mouse       | Reverse   | GCTTGGTGACAAAACTACA   |
| Ccl3        | Mip1A        | mouse       | Forward   | CAGCCAGGTGTCATTTTCCTG |
| Ccl3        | Mip1A        | mouse       | Reverse   | TCTCAGGCATTAGTTCCAGG  |
| Ccl5        | Rantes       | mouse       | Forward   | CTCACCATATGGCTCGGACA  |
| Ccl5        | Rantes       | mouse       | Reverse   | CGACTGCAAGATTGGAGCAC  |
| Egf         |              | mouse       | Forward   | AGCATACTCAGCGTCACAGC  |
| Egf         |              | mouse       | Reverse   | GCAGGACCGGCACAAGTC    |
| Egfr        |              | mouse       | Forward   | ACCTCTCCCGGTCAGAGATG  |
| Egfr        |              | mouse       | Reverse   | CTTGTGCCTTGGCAGACTTTC |
| Epgn        |              | mouse       | Forward   | AACAACACCGAAGCTGACTAC |

Supplemental Table 2 (cont.)

|              |      |              |                |                              |
|--------------|------|--------------|----------------|------------------------------|
| <b>Epgn</b>  |      | <b>mouse</b> | <b>Reverse</b> | <b>TGGTGGGAATGCACATGCTCC</b> |
| <b>Ereg</b>  |      | mouse        | Forward        | TGCTTTGTCTAGGTTCCCACC        |
| <b>Ereg</b>  |      | mouse        | Reverse        | GGCGGTACAGTTATCCTCGG         |
| <b>Hbegf</b> |      | mouse        | Forward        | TCTGGCCGCAGTGTTGTCC          |
| <b>Hbegf</b> |      | mouse        | Reverse        | GGTTTGTGGATCCAGTGGGA         |
| <b>Prpl0</b> |      | mouse        | Forward        | CTCTCGCTTTCTGGAGGGTG         |
| <b>Prpl0</b> |      | mouse        | Reverse        | ACGCGCTTGTACCCATTGAT         |
| <b>Tgfa</b>  |      | mouse        | Forward        | CTCTGCTAGCGCTGGGTATC         |
| <b>Tgfa</b>  |      | mouse        | Reverse        | TGGGCACTTGTTGAAGTGAG         |
| <b>Tgfb1</b> | Tgfβ | mouse        | Forward        | CTGCTGACCCCCACTGATAC         |
| <b>Tgfb1</b> | Tgfβ | mouse        | Reverse        | AGCCCTGTATTCCGTCTCCT         |
| <b>Tnf</b>   | Tnfa | mouse        | Forward        | ATGGCCTCCCTCTCATCAGT         |
| <b>Tnf</b>   | Tnfa | mouse        | Reverse        | CTTGGTGGTTTGCTACGACG         |
| <b>Yap1</b>  | Yap  | mouse        | Forward        | TTCGGCAGGCAATACGGAAT         |
| <b>Yap1</b>  | Yap  | mouse        | Reverse        | CATCCTGCTCCAGTGTAGGC         |

Suppl. Fig. 1: Dose-response curves and maximal EGFR phosphorylation by its different ligands in HPTC.

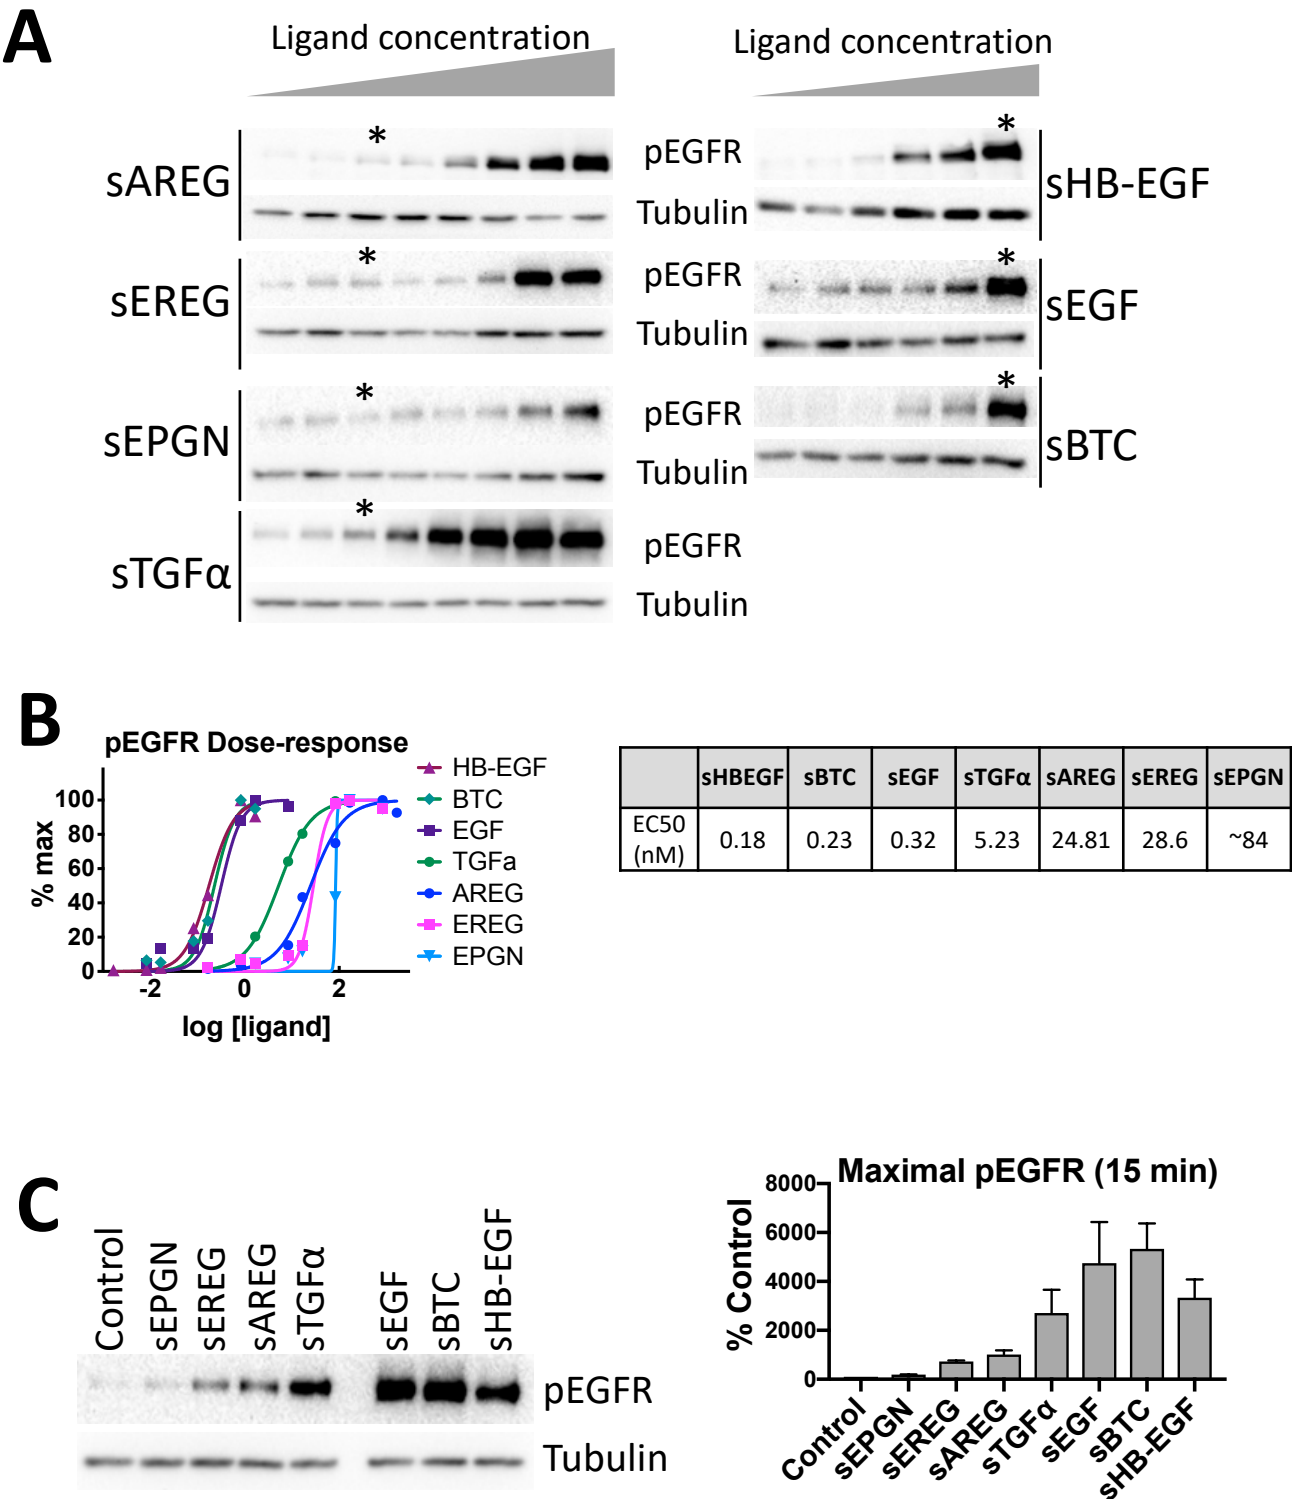

**Supplemental Figure 1: EGFR ligand dose response in HPTC. (A-B)** Serum starved HPTCs were treated for 15 min with increasing amounts of EGFR ligands and EGFR phosphorylation was tested by WB (A). A concentration range of 85 fM – 8.5 pM was used for high affinity and of 1.7 pM – 17 nM for low affinity ligands (stars denote concentration of 8.5 pM in all panels). Dose-response curves (B, right graph) and EC50 values (B, table) were calculated after normalization to 100% of maximal phosphorylation obtained by each ligand. **(C)** HPTCs were treated for 15 min with EGFR ligands in amounts sufficient to induce maximal EGFR phosphorylation by each ligand. EGFR phosphorylation was examined by WB (C, left panel) and densitometric analysis (C, column graph) was performed after normalization to non-stimulated cells. Tubulin was used in all experiments for normalization (loading control).

Suppl. Fig. 2: High affinity ligands also induce AREG release but they lead to internalization of EGFR.

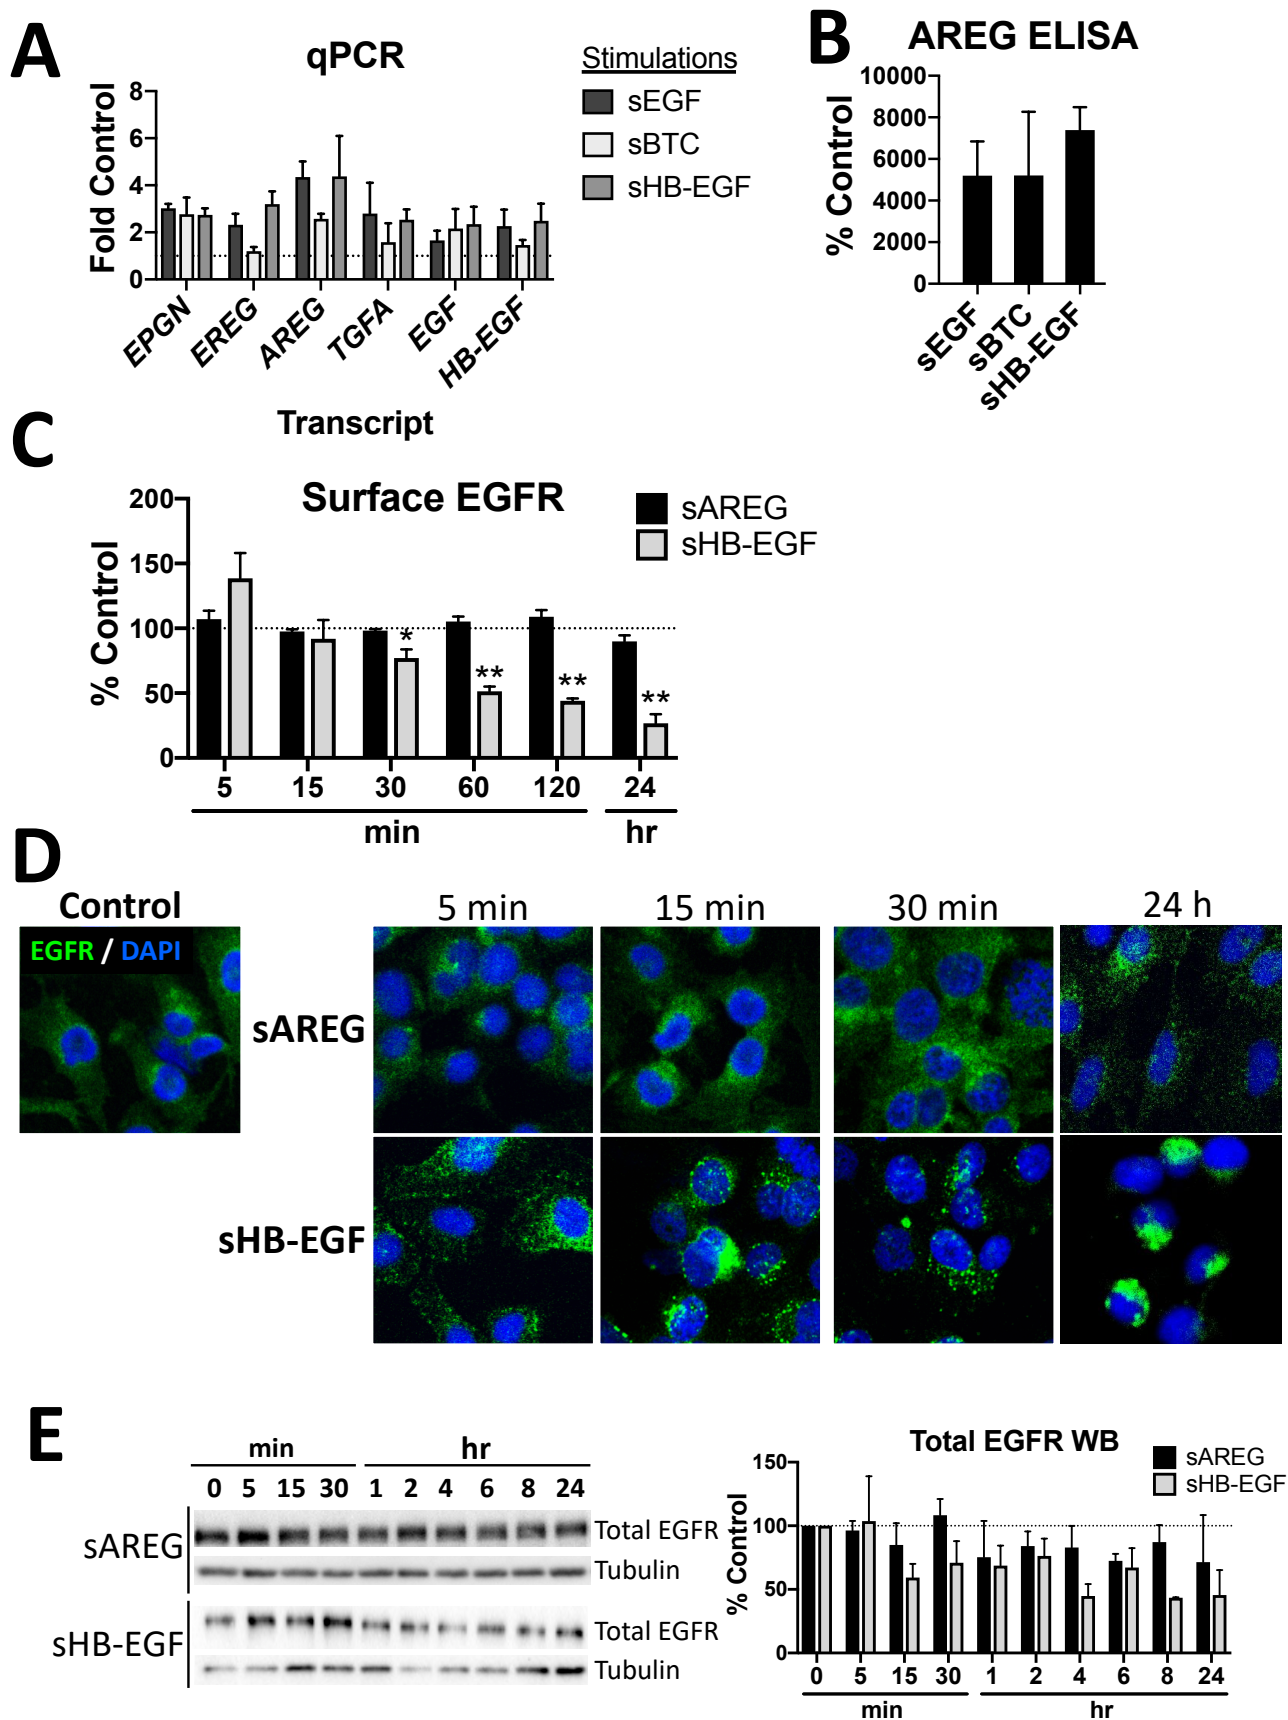

**F**

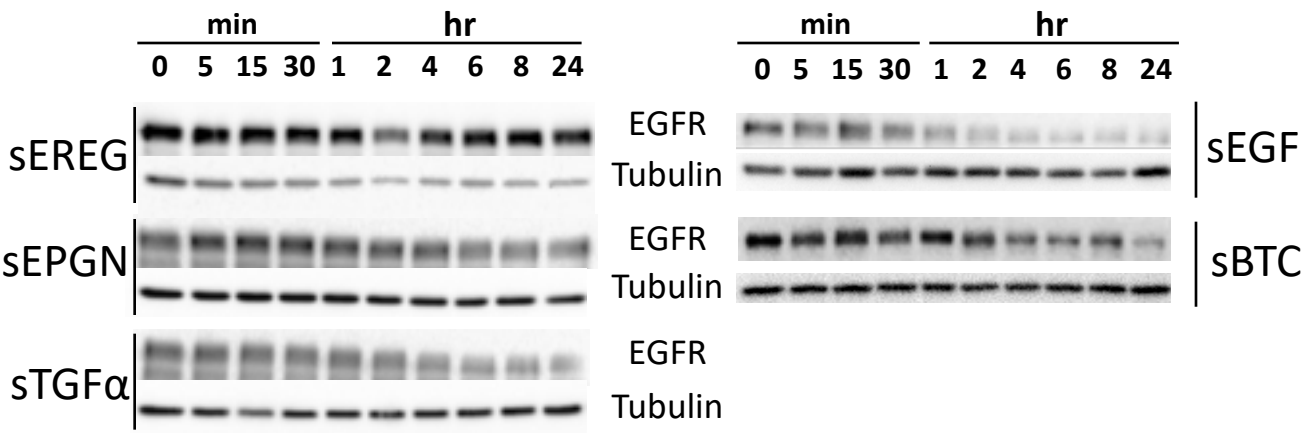

**G**

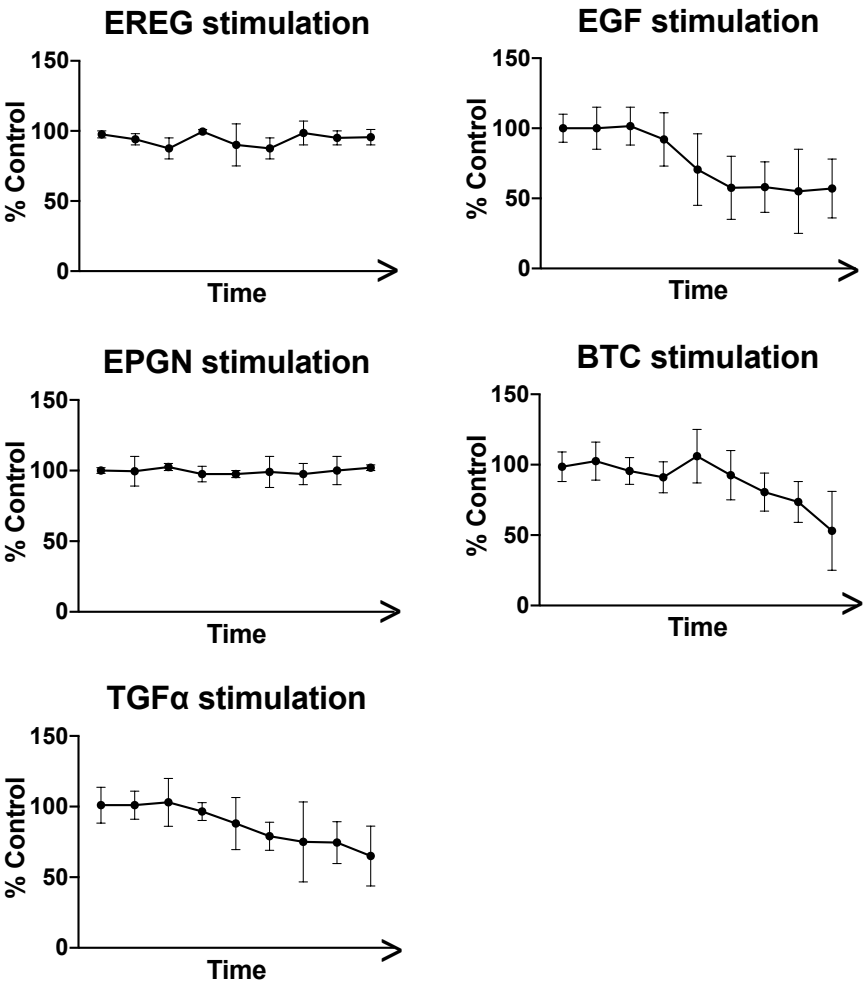

**Supplemental Figure 2. sAREG and sHB-EGF differentially regulate EGFR cell-surface levels in HPTCs.** **(A)** HPTCs were treated with different EGFR ligands (shown in the legend) for 24h and mRNA expression of endogenous EGFR ligands (shown in x-axis) was tested by qPCR. Results are presented after normalization to control-stimulated cells (fold control). **(B)** Endogenous sAREG released in HPTC culture medium was measured by ELISA after stimulation with soluble high affinity EGFR ligands. Results are presented as percentile of sAREG concentration in medium of control-stimulated cells (% Control). **(C)** HPTCs were treated with equimolar amounts of sAREG or sHB-EGF and surface levels of EGFR were measured by flow cytometry at different time points as noted. Results are presented after normalization to surface EGFR of control-stimulated cells corresponding to each respective time point (% Control). **(D)** HPTCs were treated with equimolar amounts of sAREG or sHB-EGF and EGFR cellular distribution was examined by immunocytochemistry at different time points as noted. **(E)** HPTCs were treated with equimolar amounts of sAREG or sHB-EGF and total EGFR levels were examined by western blot (left panels) and quantified by densitometric analysis (right panel) at different time points as noted. Tubulin was used as loading control. **(F, G)** HPTCs were treated with equimolar amounts of EGFR ligands and total EGFR levels were examined by western blot (top panels) and quantified by densitometric analysis (bottom panels) at different time points as noted. Tubulin was used as loading control. n=3-4 for all experiments, \*:  $P<0.05$ , \*\*:  $P<0.01$ .
